# Supplementary material for: Pressure-induced superconductivity of Ac–B–H hydrides
Source: Royal Society of Chemistry journal article supplement (doi:10.1039/d3cp02099a), 2023-01-01
Supplement: d3cp02099a1.pdf [file d3cp02099a1.pdf]

**Supplementary Information** for the paper entitled  
“Pressure-induced superconductivity of the Ac-B-H hydrides”

Wen-Hua Li,<sup>a</sup> Wen-Hua Yang,<sup>\*a</sup> Wen-Cai Lu,<sup>\*ab</sup>

<sup>a</sup>College of Physics, Qingdao University, Qingdao, Shandong 266071, P. R. China

<sup>b</sup>Institute of Theoretical Chemistry, Jilin University, Changchun, Jilin 130021, P. R. China

-----  
\*Corresponding author. Email: [wencailu@jlu.edu.cn](mailto:wencailu@jlu.edu.cn); [yangwh@qdu.edu.cn](mailto:yangwh@qdu.edu.cn).

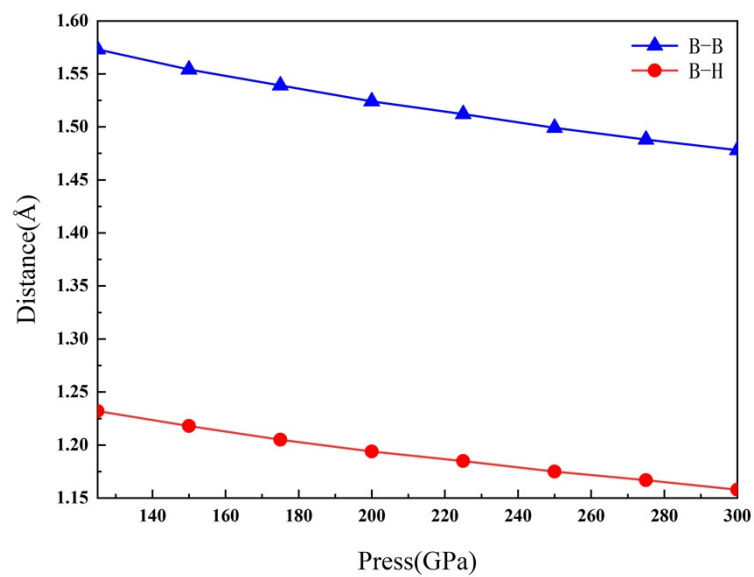

Fig. S1. The distance between B-B and B-H at different pressures for the predicted structure  $I4/mmm$ -AcB<sub>2</sub>H<sub>8</sub>.

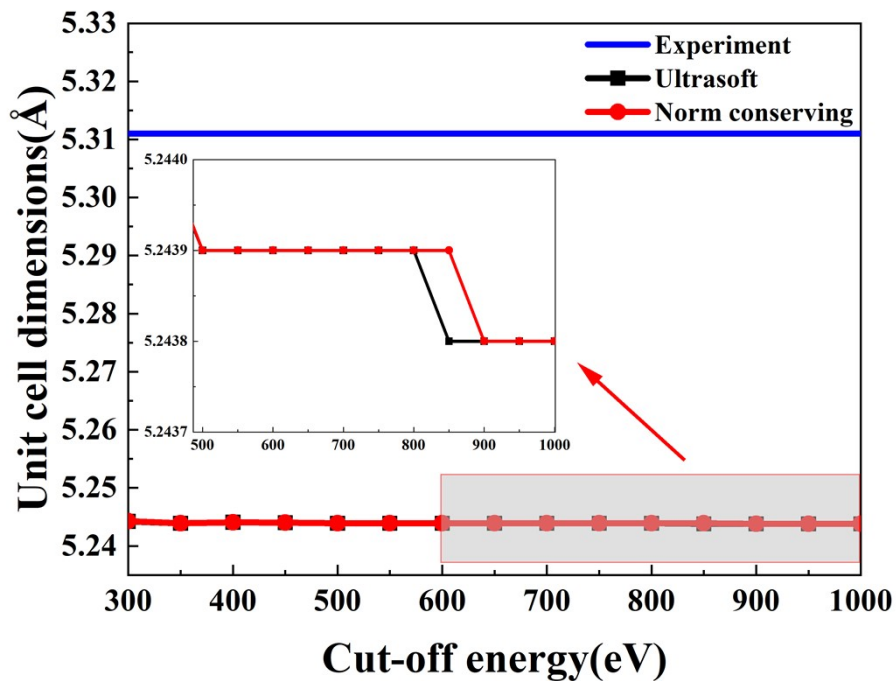

Fig. S2. Calculated lattice parameter of bulk Ac at 0 K and ambient pressure using ultrasoft pseudopotential (black line) and norm-conserving pseudopotential (red line), which were compared with the experimental data of bulk Ac (blue line).

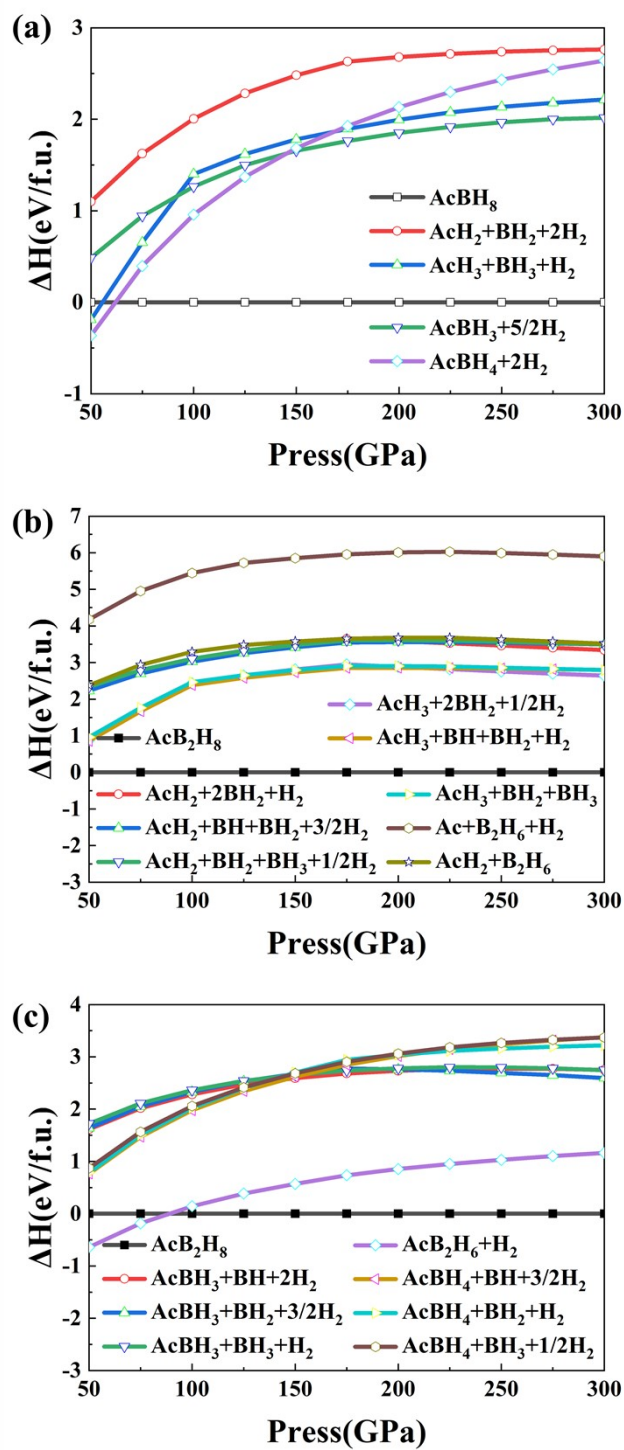

Fig. S3. (a) Enthalpy difference curves of  $R^3m$ - $\text{AcBH}_8$  at different pressures, (b) and (c) Enthalpy difference curves of  $I4/mmm$ - $\text{AcB}_2\text{H}_8$  at different pressures.

Table S1. Lattice parameters and atomic fractional coordinates of the  $\text{AcB}_m\text{H}_n$  ( $m = 1-3$  and  $n = 3-12$ ) structures.

| Space group<br>Press                                      | Lattice<br>parameters | Atomic coordinates (fractional) |          |          |          | Sites |
|-----------------------------------------------------------|-----------------------|---------------------------------|----------|----------|----------|-------|
| <i>R3m</i><br>$\text{AcBH}_3$<br>100GPa                   | a = 4.5338            | H                               | 0.07484  | -0.53742 | -0.04419 | 9b    |
|                                                           | b = 4.5338            | B                               | -0.66667 | -1.33333 | 0.16718  | 3a    |
|                                                           | c = 5.5462            | Ac                              | -1.33333 | -1.66667 | 0.34860  | 3a    |
| <i>R3m</i><br>$\text{AcBH}_4$<br>70GPa                    | a = 3.6645            | H                               | -0.31982 | -0.15991 | -0.09259 | 9b    |
|                                                           | b = 3.6645            | H                               | -0.33333 | 0.33333  | -0.19568 | 3a    |
|                                                           | c = 10.4031           | B                               | 0.33333  | 0.66667  | -0.13817 | 3a    |
|                                                           |                       | Ac                              | 0.00000  | 1.00000  | -0.29275 | 3a    |
| <i>R3m</i><br>$\text{AcBH}_5$<br>150GPa                   | a = 3.8705            | H                               | 0.01513  | -0.49244 | -0.06932 | 9b    |
|                                                           | b = 3.8705            | H                               | 0.00000  | 0.00000  | -0.08649 | 3a    |
|                                                           | c = 7.9815            | H                               | 0.33333  | -0.33333 | 0.13771  | 3a    |
|                                                           |                       | B                               | 0.33333  | -0.33333 | -0.00966 | 3a    |
|                                                           |                       | Ac                              | 0.00000  | 0.00000  | -0.18217 | 3a    |
| <i>R<math>\bar{3}</math>m</i><br>$\text{AcBH}_8$<br>70GPa | a = 4.1663            | H                               | -0.17102 | 0.65796  | -0.23366 | 18h   |
|                                                           | b = 4.1663            | H                               | -0.66667 | 0.66667  | -0.07348 | 6c    |
|                                                           | c = 9.2796            | B                               | -0.33333 | 0.33333  | -0.16667 | 3b    |
|                                                           |                       | Ac                              | 0.00000  | 0.00000  | 0.00000  | 3a    |
| <i>Imm2</i><br>$\text{AcB}_2\text{H}_6$<br>125GPa         | a = 6.7790            | H                               | 0.30427  | 0.23353  | 0.16849  | 8e    |
|                                                           | b = 3.8116            | H                               | 0.35409  | 0.50000  | 0.75217  | 4c    |
|                                                           | c = 3.3085            | B                               | 0.61529  | 0.50000  | 0.12304  | 4c    |
|                                                           |                       | Ac                              | 0.50000  | 0.00000  | 0.63276  | 2b    |
| <i>I4/mmm</i><br>$\text{AcB}_2\text{H}_8$<br>125GPa       | a = 3.6792            | H                               | -0.50000 | 0.17851  | 0.33210  | 16n   |
|                                                           | b = 3.6792            | B                               | -0.50000 | 0.50000  | 0.38314  | 4e    |
|                                                           | c = 6.7313            | Ac                              | 0.00000  | 1.00000  | 0.50000  | 2b    |
